# Supplementary material for: Lu(iii) bis-phthalocyanines containing carbazole moieties: synthesis, characterization, electrochemical properties and sensor applications
Source: Royal Society of Chemistry journal article supplement (doi:10.1039/d1nj04052a), 2021-01-01
Supplement: d1nj04052a1.pdf [file d1nj04052a1.pdf]

# Supplementary Information

## **Lu(III) bis-phthalocyanines containing carbazole moieties: Synthesis, characterization, electrochemical properties and sensor applications**

Hidayet Sarıoğulları, İbrahim F. Sengul, Ayşe Gül Gürek\*

*Gebze Technical University, Department of Chemistry, 41400 Gebze, Kocaeli-TURKEY*

Corresponding Author:

Ayşe Gül Gürek, E-mail :gurek@gtu.edu.t

## Table of Contents

|                                                                                                                                                                                                                              |    |
|------------------------------------------------------------------------------------------------------------------------------------------------------------------------------------------------------------------------------|----|
| The synthesis of 9-ethyl-9H-carbazol-3-ol ( <b>3</b> ).....                                                                                                                                                                  | 3  |
| <b>Fig. S1.</b> The FT-IR spectrum of carbazole derivative <b>3</b> .....                                                                                                                                                    | 4  |
| <b>Fig. S2.</b> The <sup>1</sup> H-NMR spectrum of carbazole derivative <b>3</b> in CDCl <sub>3</sub> .....                                                                                                                  | 4  |
| <b>Fig. S3.</b> The <sup>13</sup> C-NMR spectrum of carbazole derivative <b>3</b> in CDCl <sub>3</sub> .....                                                                                                                 | 5  |
| <b>Fig. S4.</b> The ESI-mass spectrum of carbazole derivative <b>3</b> .....                                                                                                                                                 | 6  |
| <b>Fig. S5.</b> The FT-IR spectrum of 4-((9-ethyl-9H-carbazol-3-yl)oxy)-5-hydroxy-phthalonitrile ( <b>5</b> ).....                                                                                                           | 6  |
| <b>Fig. S6.</b> The <sup>1</sup> H-NMR spectrum of 4-((9-ethyl-9H-carbazol-3-yl)oxy)-5-hydroxy-phthalonitrile ( <b>5</b> ) in CDCl <sub>3</sub> .....                                                                        | 7  |
| <b>Fig. S7.</b> <sup>13</sup> C-NMR spectrum of 4-((9-ethyl-9H-carbazol-3-yl)oxy)-5-hydroxy-phthalonitrile ( <b>5</b> ) in CDCl <sub>3</sub> .....                                                                           | 7  |
| <b>Fig. S8.</b> MALDI-TOF mass spectrum of 4-((9-ethyl-9H-carbazol-3-yl)oxy)-5-hydroxyphthalonitrile ( <b>5</b> ) (matrix:DIT).....                                                                                          | 8  |
| <b>Fig. S9.</b> FT-IR spectrum of 4,5-bis((9-ethyl-9H-carbazol-3-yl)oxy)phthalonitrile ( <b>7</b> ).....                                                                                                                     | 8  |
| <b>Fig. S10.</b> <sup>1</sup> H-NMR spectrum of 4,5-bis((9-ethyl-9H-carbazol-3-yl)oxy)phthalonitrile ( <b>7</b> ) in CDCl <sub>3</sub> .....                                                                                 | 9  |
| <b>Fig. S11.</b> <sup>13</sup> C-NMR spectrum of 4,5-bis((9-ethyl-9H-carbazol-3-yl)oxy)phthalonitrile ( <b>7</b> ) in CDCl <sub>3</sub> .....                                                                                | 9  |
| <b>Fig. S12.</b> MALDI-TOF spectrum of 4,5-bis((9-ethyl-9H-carbazol-3-yl)oxy)phthalonitrile ( <b>7</b> ) (matrix:DHB).....                                                                                                   | 10 |
| <b>Fig. S13.</b> FTIR spectrum of <b>Car-Pc<sub>2</sub>-1</b> .....                                                                                                                                                          | 10 |
| <b>Fig. S14.</b> <sup>1</sup> H-NMR spectrum of reduced <b>Car-Pc<sub>2</sub>-1</b> in THF+NaBD <sub>4</sub> .....                                                                                                           | 11 |
| <b>Fig. S15.</b> <sup>13</sup> C NMR spectrum of <b>Car-Pc<sub>2</sub>-1</b> in THF- <i>d</i> <sub>8</sub> +NaBD <sub>4</sub> .....                                                                                          | 11 |
| <b>Fig. S16.</b> MALDI-TOF spectrum of <b>Car-Pc<sub>2</sub>-1</b> (matrix:DHB).....                                                                                                                                         | 12 |
| <b>Fig. S17.</b> FTIR spectrum of <b>Car-Pc<sub>2</sub>-2</b> .....                                                                                                                                                          | 12 |
| <b>Fig. S18.</b> <sup>1</sup> H-NMR spectrum of reduced <b>Car-Pc<sub>2</sub>-2</b> in THF- <i>d</i> <sub>8</sub> + NaBD <sub>4</sub> .....                                                                                  | 13 |
| <b>Fig. S19.</b> <sup>13</sup> C NMR spectrum of <b>Car-Pc<sub>2</sub>-2</b> in THF- <i>d</i> <sub>8</sub> +NaBD <sub>4</sub> .....                                                                                          | 13 |
| <b>Fig. S20.</b> MALDI-TOF spectrum of <b>Car-Pc<sub>2</sub>-2</b> (matrix:DHB).....                                                                                                                                         | 14 |
| <b>Fig. S21.</b> Electronic absorption spectra of <b>Car-Pc<sub>2</sub>-1</b> in THF at six different concentration... 14                                                                                                    | 14 |
| <b>Fig. S22.</b> Electronic absorption spectra of <b>Car-Pc<sub>2</sub>-2</b> in THF at six different concentration... 15                                                                                                    | 15 |
| <b>Fig. S23.</b> Reduced (left) and neutral (right) forms of <b>Car-Pc<sub>2</sub>-1</b> (A) and <b>Car-Pc<sub>2</sub>-2</b> (B) bisphthalocyanine derivatives.....                                                          | 15 |
| <b>Fig. S24.</b> SEM images of <b>Car-Pc<sub>2</sub>-2</b> (A), <b>Ply(Car-Pc<sub>2</sub>-2)</b> (B), <b>Grp/Ply(Car-Pc<sub>2</sub>-2)</b> (C) and <b>Grp/Car-Pc<sub>2</sub>-2</b> (D) films deposited on FTO electrode..... | 16 |
| <b>Fig. S25.</b> EDX image of <b>Grp/Ply(Car-Pc-1)/GCE</b> .....                                                                                                                                                             | 17 |
| <b>Fig. S26.</b> EDX image of <b>Grp/Car-Pc-1/GCE</b> .....                                                                                                                                                                  | 18 |
| <b>Fig. S27.</b> EDX image of <b>Grp/Ply(Car-Pc-2)/GCE</b> .....                                                                                                                                                             | 19 |
| <b>Fig. S28.</b> EDX image of <b>Grp/Car-Pc-2/GCE</b> .....                                                                                                                                                                  | 20 |
| <b>Fig. S29.</b> UV-Vis spectra of <b>Car-Pc<sub>2</sub>-2</b> based films on FTO.....                                                                                                                                       | 20 |
| <b>Fig. S30.</b> Raman (A) and FT-IR (B) spectra of <b>Car-Pc<sub>2</sub>-2</b> based films on FTO.....                                                                                                                      | 21 |
| <b>Fig. S31.</b> Effect of the presence of interfering agents on the peak current AA, DA and UA for <b>Grp/Car-Pc<sub>2</sub>-2/GCE</b> .....                                                                                | 21 |
| <b>Fig. S32.</b> Typical DPV of 160 μM for AA on <b>Grp/Car-Pc<sub>2</sub>-1/GCE</b> under different pH values.....                                                                                                          | 22 |

### ***The synthesis of 9-ethyl-9H-carbazol-3-ol (3)***

Compound **3** was synthesized according to literatures<sup>1</sup>.

The compound **2** (1 equiv) were taken in a round bottomed flask and dry methanol was added in nitrogen gas. then hydrogen peroxide (30 % , 1 equiv), concentrated sulphuric acid (0.1 equiv) was added to the flask in 0 °C The mixture was stirred under nitrogen gas at 25 °C for 2 h and then methanol was removed from reaction under vacuum. The crude product was extracted with distilled water and ethyl acetate. Collected organic layer dried over anhydrous sodium sulfate and the volatiles were allowed to remove under vacuum. The crude product was purified by column chromatography on silica gel using CH<sub>2</sub>Cl<sub>2</sub> as as the eluent. Compound **3** was obtained as a white solid. Yield: 82%. FT-IR (ATR)  $\nu$ , cm<sup>-1</sup>: 3291, (O-H), 3053 (Ar C-H), 2973-2874 (aliphatic C-H), 1630, 1605, 1485, 1471, 1447, 1345, 1315, 1278, 1229, 1147, 1084, 1021, 936, 876. <sup>1</sup>H NMR (500 MHz, CDCl<sub>3</sub>):  $\delta$  ppm = 8.03 (d,ArH, 1H), 7.57 (s, ArH, 1H), 7.47 (t, ArH, 1H), 7.39 (d, ArH, 1H), 7.29 (d, ArH, 1H), 7.20 (t, ArH, 1H), 7.06 (m, ArH, 1H), 4.34 (q, CH<sub>2</sub>, 2H) 1.43 (t, CH<sub>3</sub>, 3H). <sup>13</sup>C NMR (125 MHz, CDCl<sub>3</sub>):  $\delta$  ppm = 148.87(ArC), 140.63( ArC), 135.10(ArC), 125.75(ArCH), 123.54(ArC), 122.45(ArC), 120.53(ArCH), 118.27(ArCH), 114.59(ArCH), 109.02(ArCH), 108.51(ArCH), 106.00(ArCH), 37.61 (CH<sub>2</sub>), 13.82(CH<sub>3</sub>) ESI-MS m/z: 212.2[M+H]<sup>+</sup>, 274,3 [M+Na+K]<sup>+</sup>, 337.2 [M+2Na+2K]<sup>+</sup>, 486.3[M+5Na+4K]<sup>+</sup>. calcd. for C<sub>14</sub>H<sub>13</sub>NO.

### **Reference**

1. Gourab Dey, Pankaj Gaur, Rajanish Giri, Subrata Ghosh, *Chem. Commun.*, 2016, 52, 1887-1890.

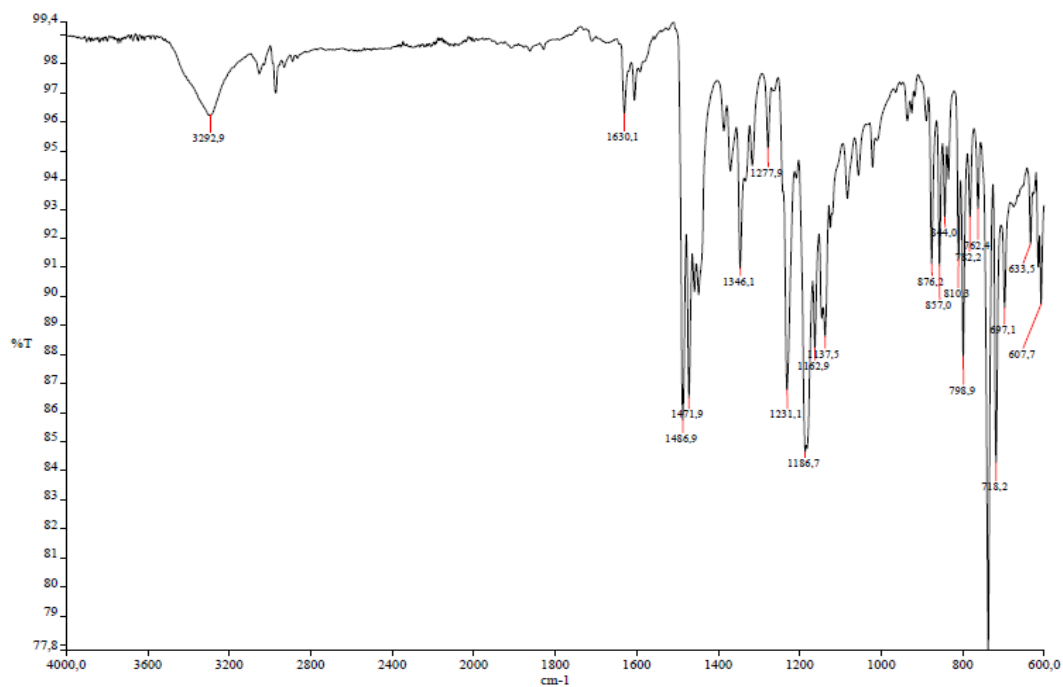

**Fig. S1.** The FT-IR spectrum of carbazole derivative **3**

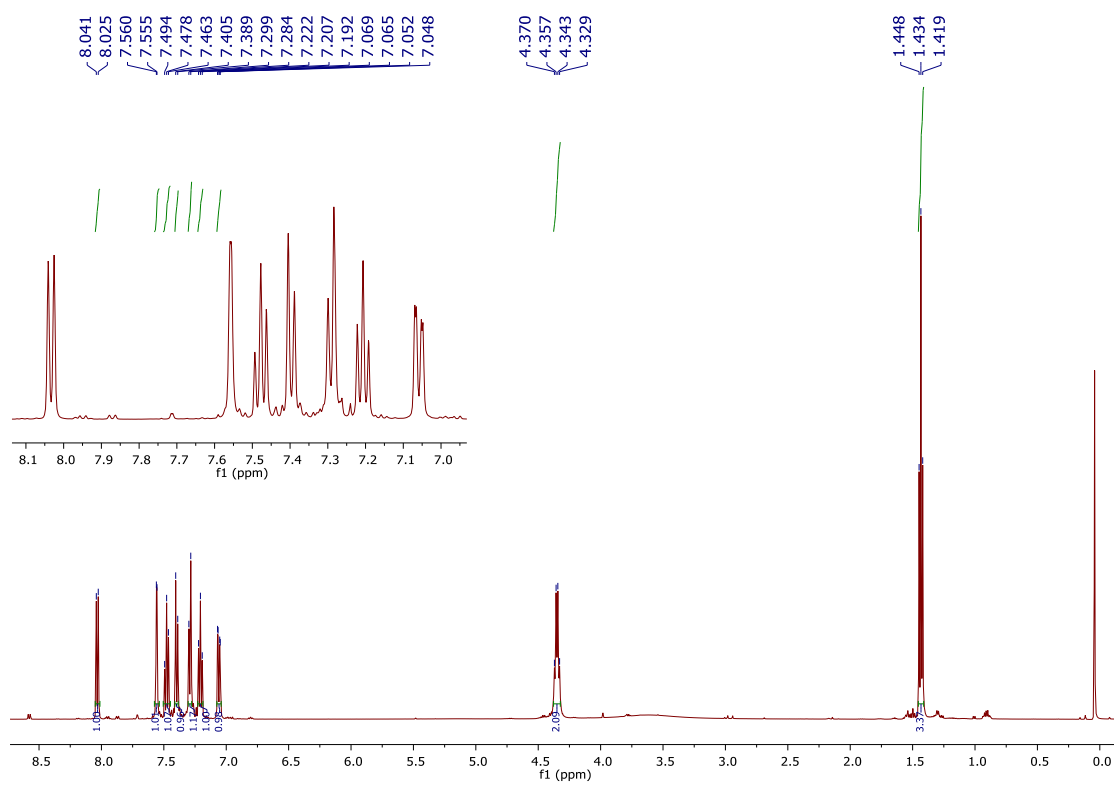

**Fig. S2.** The <sup>1</sup>H-NMR spectrum of carbazole derivative **3** in CDCl<sub>3</sub>

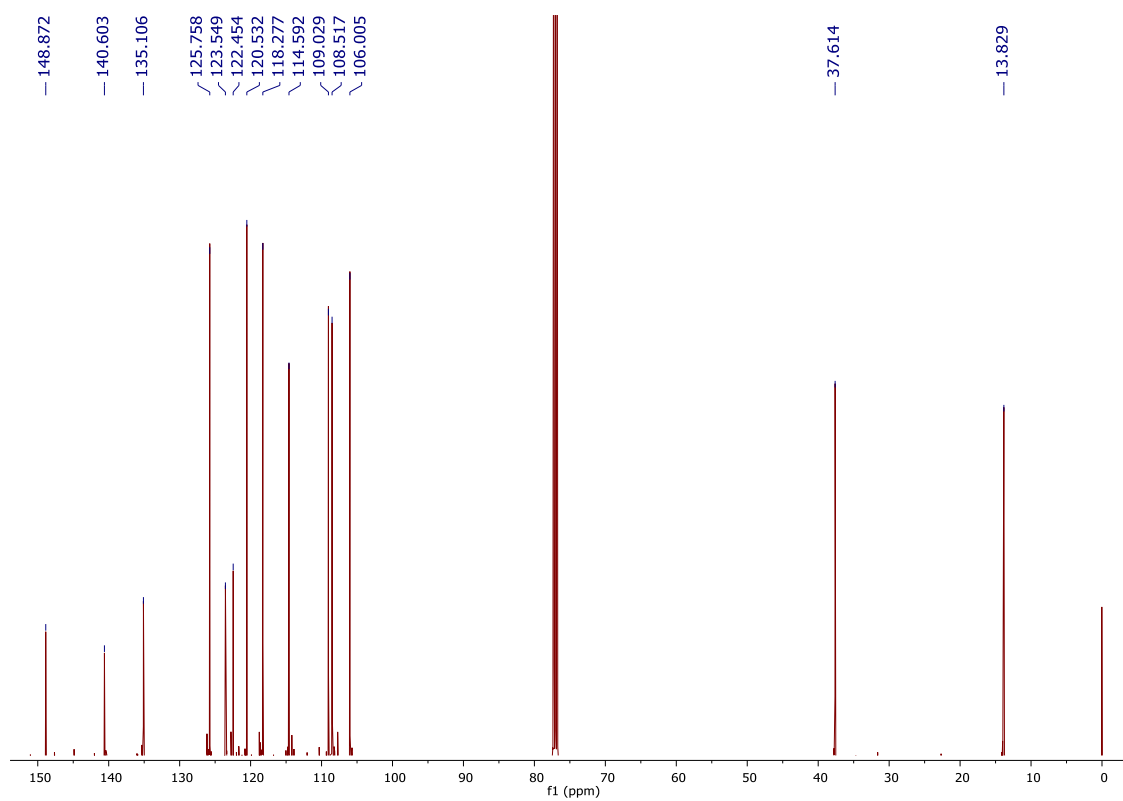

**Fig. S3.** The  $^{13}\text{C}$ -NMR spectrum of carbazole derivative **3** in  $\text{CDCl}_3$

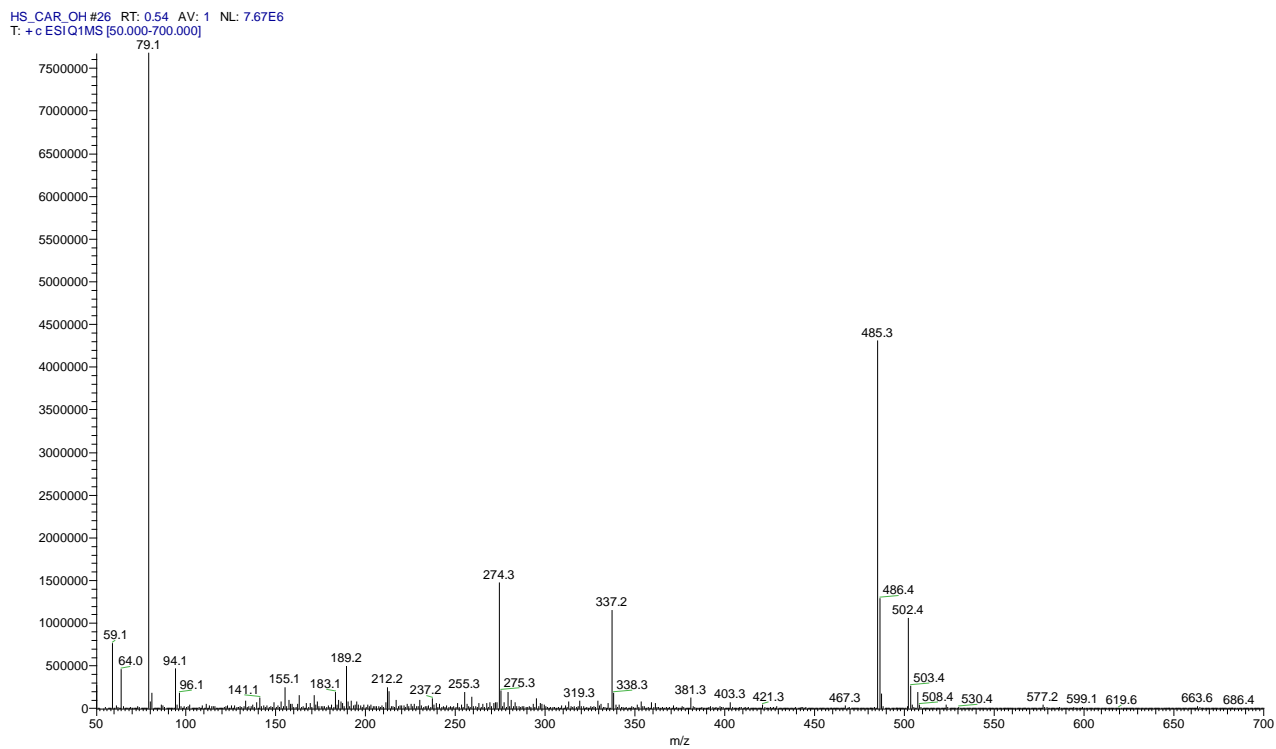

**Fig. S4.** The ESI-mass spectrum of carbazole derivative **3**

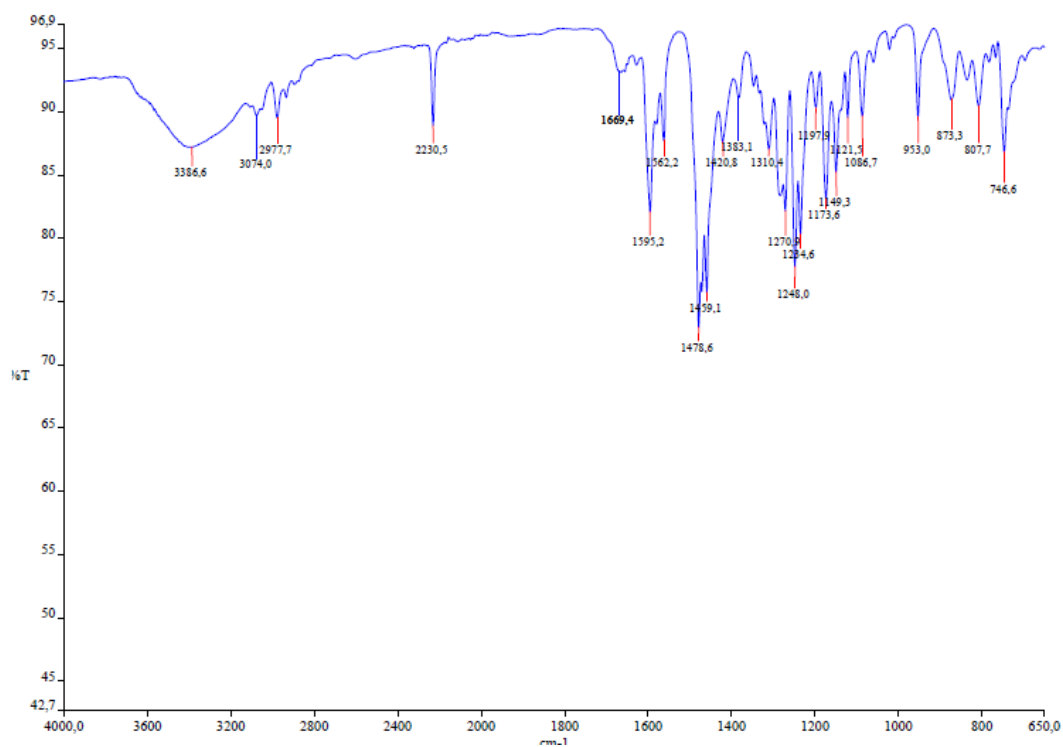

**Fig. S5.** The FT-IR spectrum of of 4-((9-ethyl-9H-carbazol-3-yl)oxy)-5-hydroxyphthalonitrile (**5**)

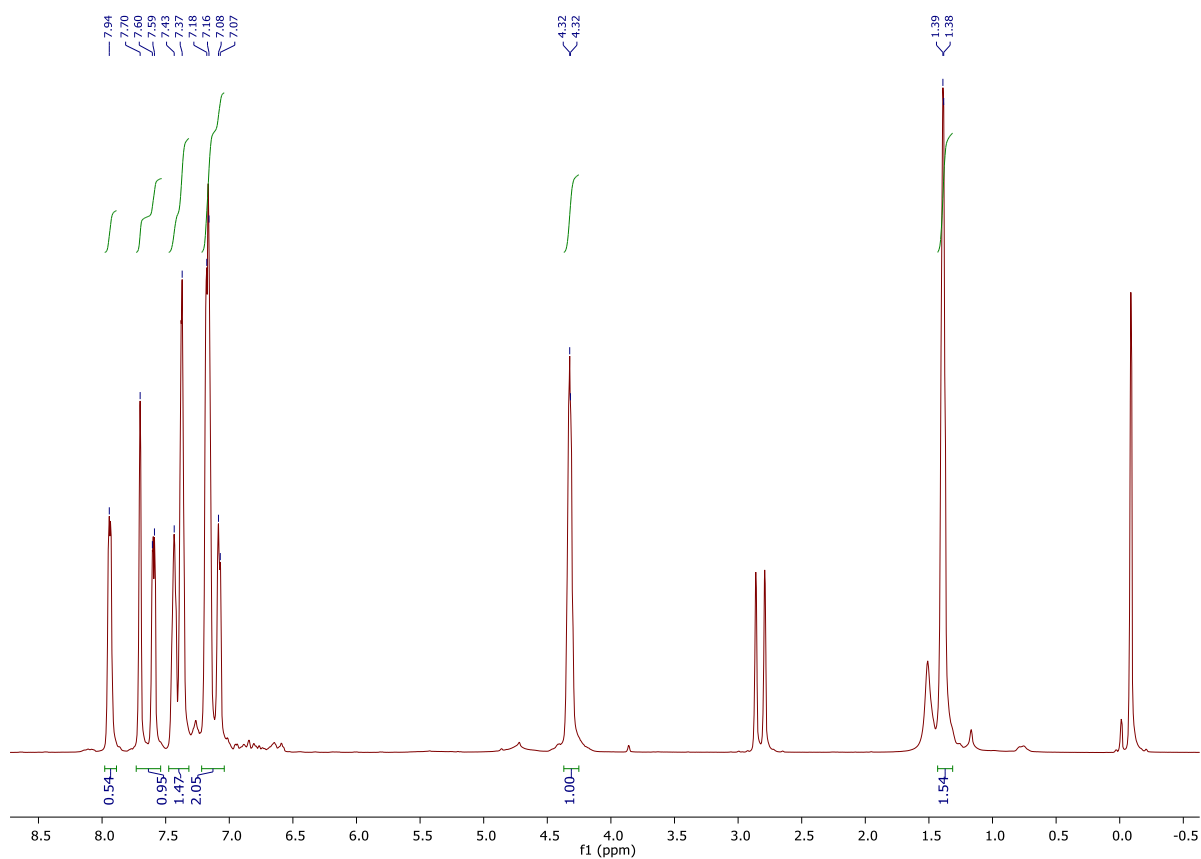

**Fig. S6.** The  $^1\text{H-NMR}$  spectrum of 4-((9-ethyl-9H-carbazol-3-yl)oxy)-5-hydroxyphthalonitrile (**5**) in  $\text{CDCl}_3$

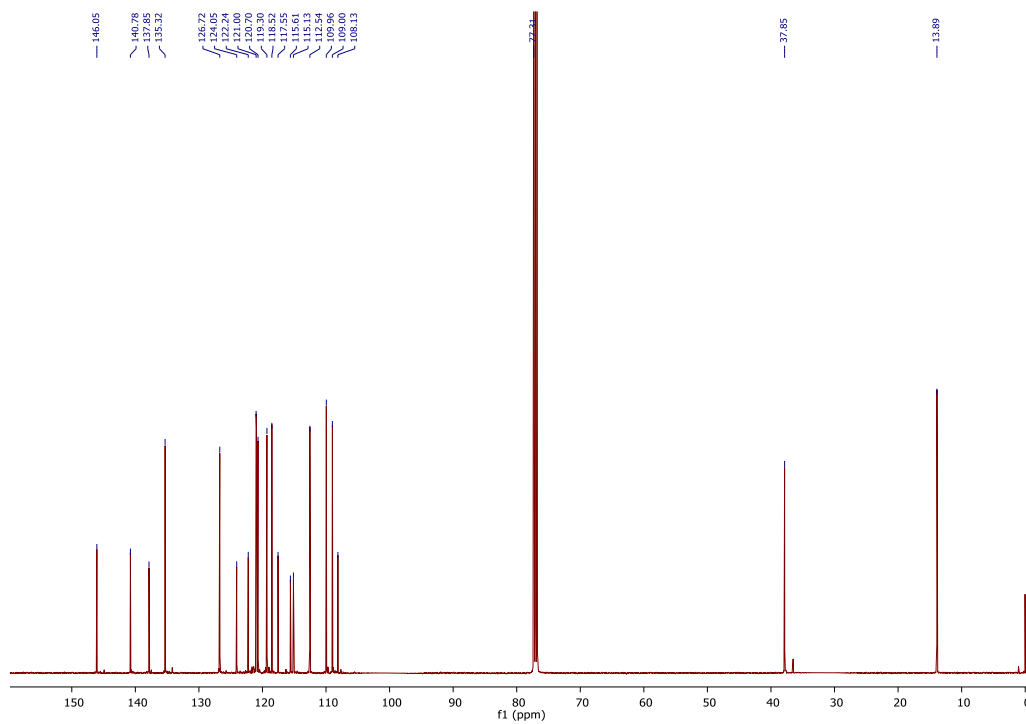

**Fig. S7.**  $^{13}\text{C}$ -NMR spectrum of 4-((9-ethyl-9H-carbazol-3-yl)oxy)-5-hydroxyphthalonitrile (**5**) in  $\text{CDCl}_3$

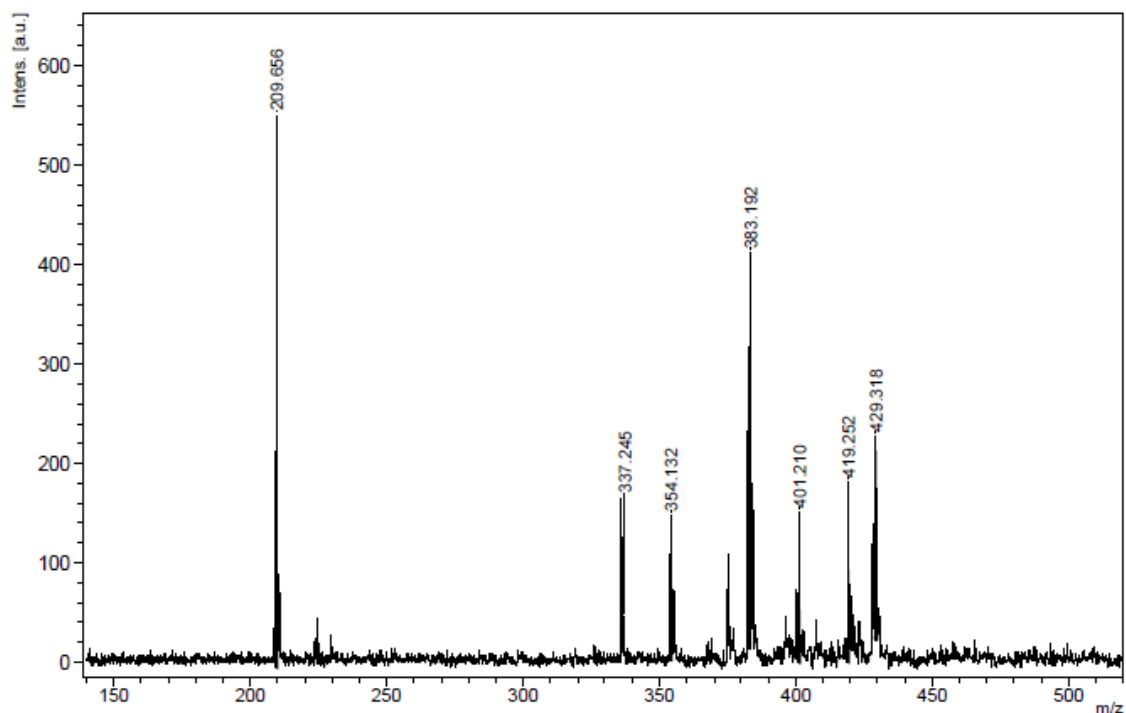

**Fig. S8.** MALDI-TOF mass spectrum of 4-((9-ethyl-9H-carbazol-3-yl)oxy)-5-hydroxyphthalonitrile (**5**) (matrix:DIT)

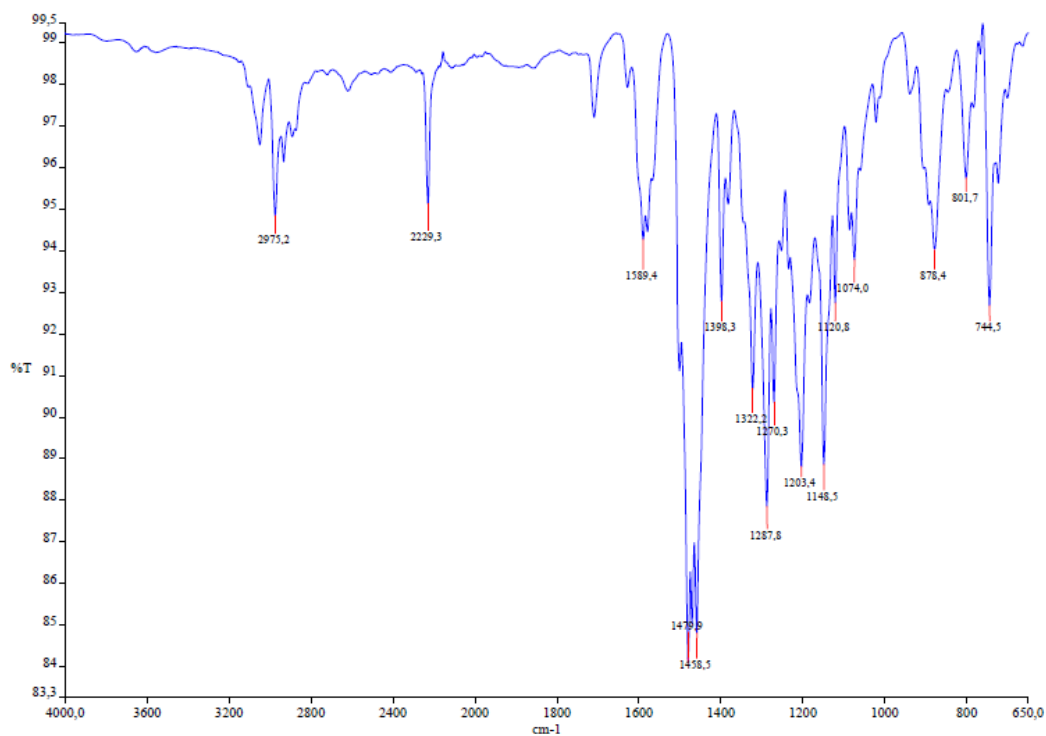

**Fig. S9.** FT-IR spectrum of 4,5-bis((9-ethyl-9H-carbazol-3-yl)oxy)phthalonitrile (**7**)



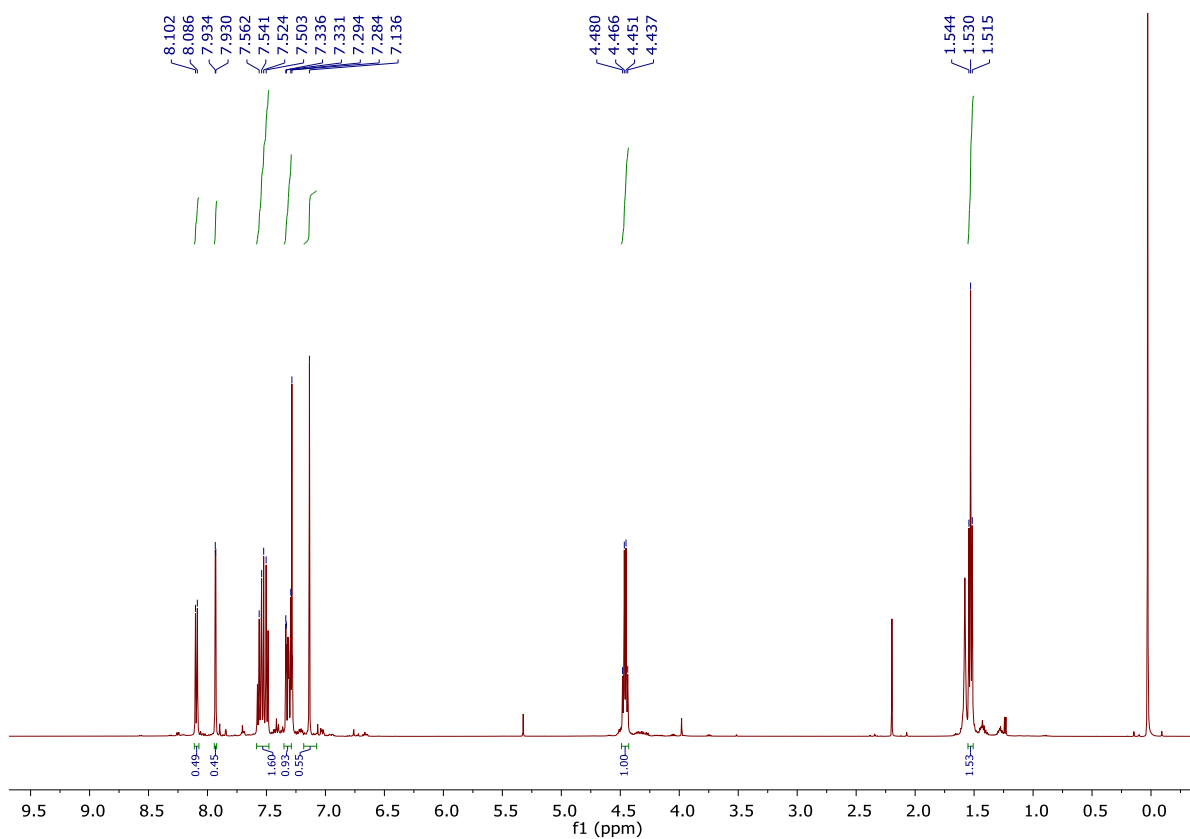

**Fig. S10.**  $^1\text{H-NMR}$  spectrum of 4,5-bis((9-ethyl-9H-carbazol-3-yl)oxy)phthalonitrile (**7**) in  $\text{CDCl}_3$

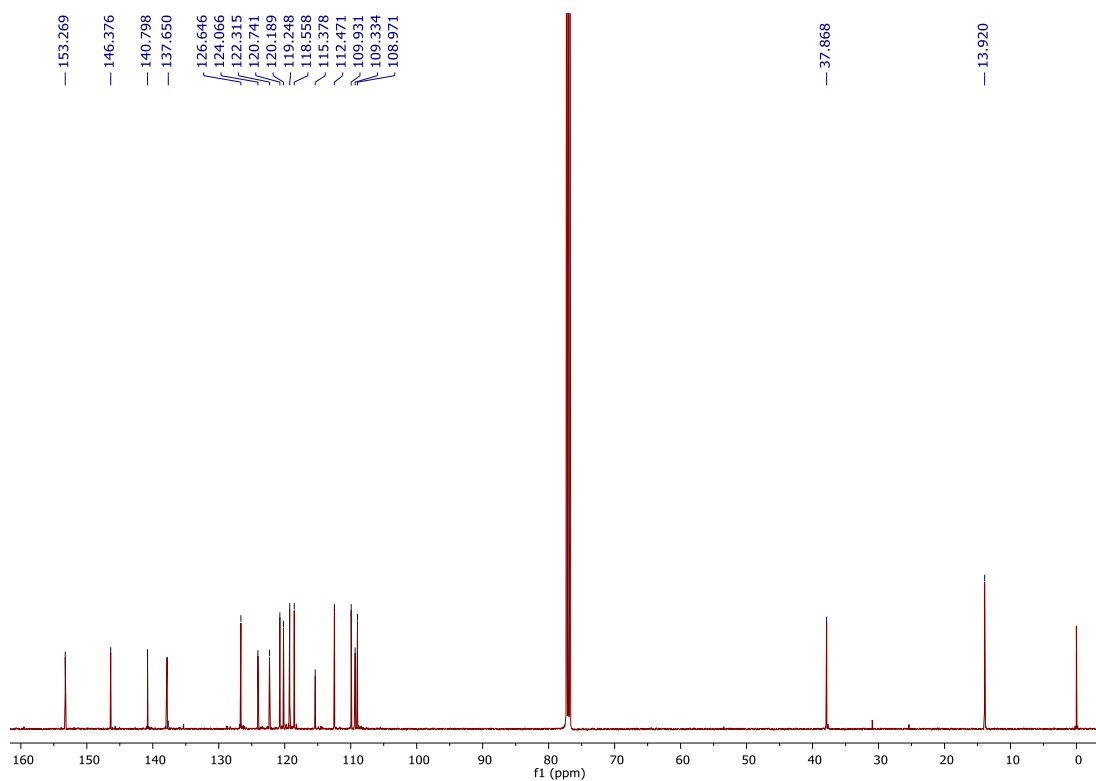

**Fig. S11.**  $^{13}\text{C-NMR}$  spectrum of 4,5-bis((9-ethyl-9H-carbazol-3-yl)oxy)phthalonitrile (**7**) in  $\text{CDCl}_3$

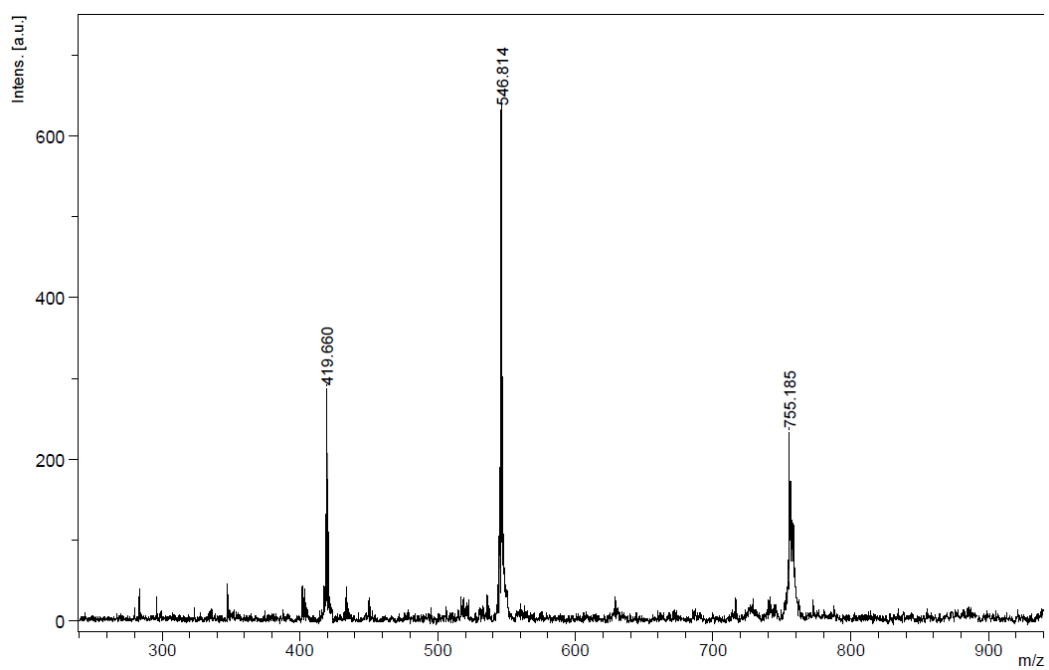

**Fig. S12.** MALDI-TOF spectrum of 4,5-bis((9-ethyl-9H-carbazol-3-yl)oxy)phthalonitrile (**7**) (matrix:DHB)

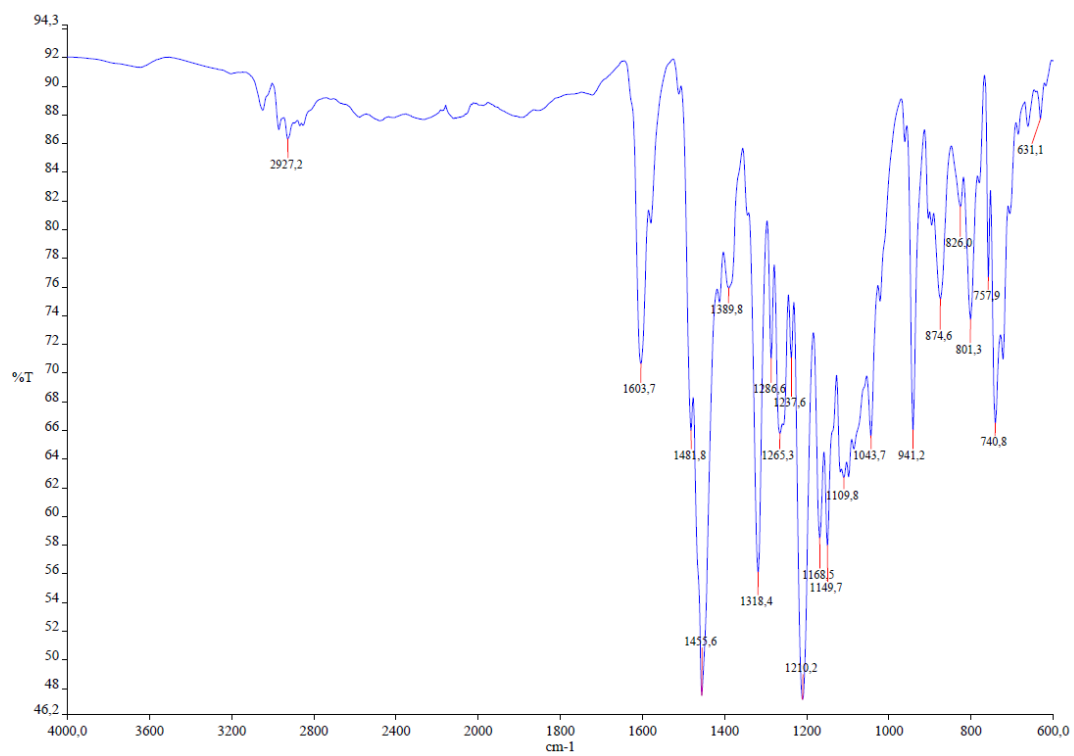

**Fig. S13.** FTIR spectrum of **Car-Pc<sub>2</sub>-1**

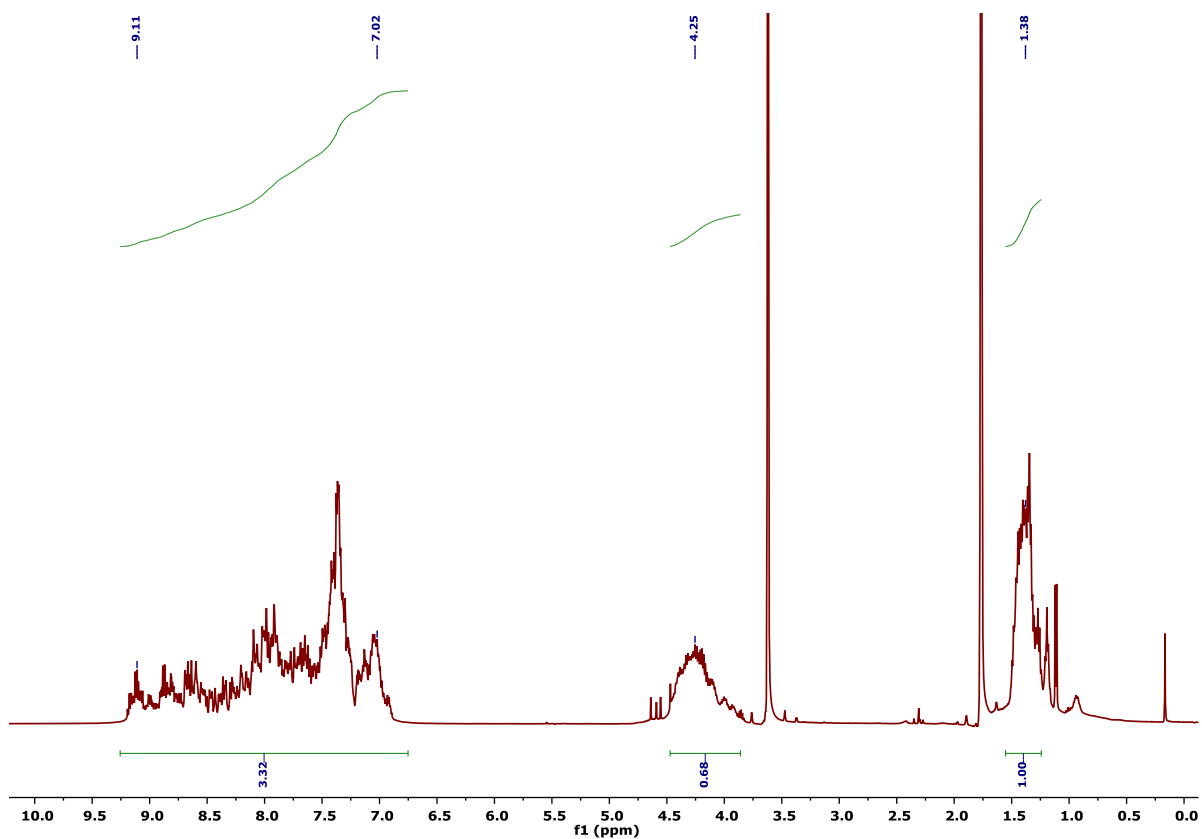

**Fig. S14.**  $^1\text{H}$ -NMR spectrum of reduced **Car-Pc<sub>2</sub>-1** in THF+NaBD<sub>4</sub>,

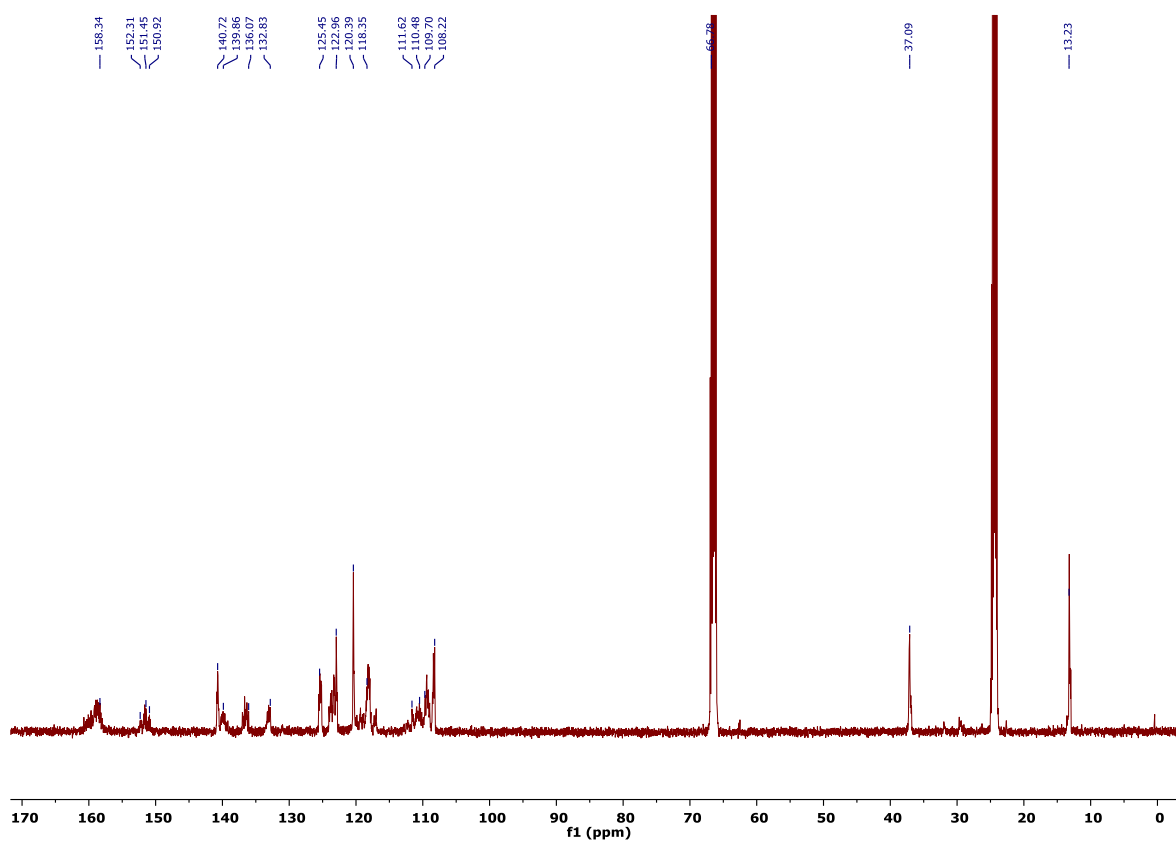

**Fig. S15.**  $^{13}\text{C}$  NMR spectrum of **Car-Pc<sub>2</sub>-1** in THF-*d*<sub>8</sub> + NaBD<sub>4</sub>

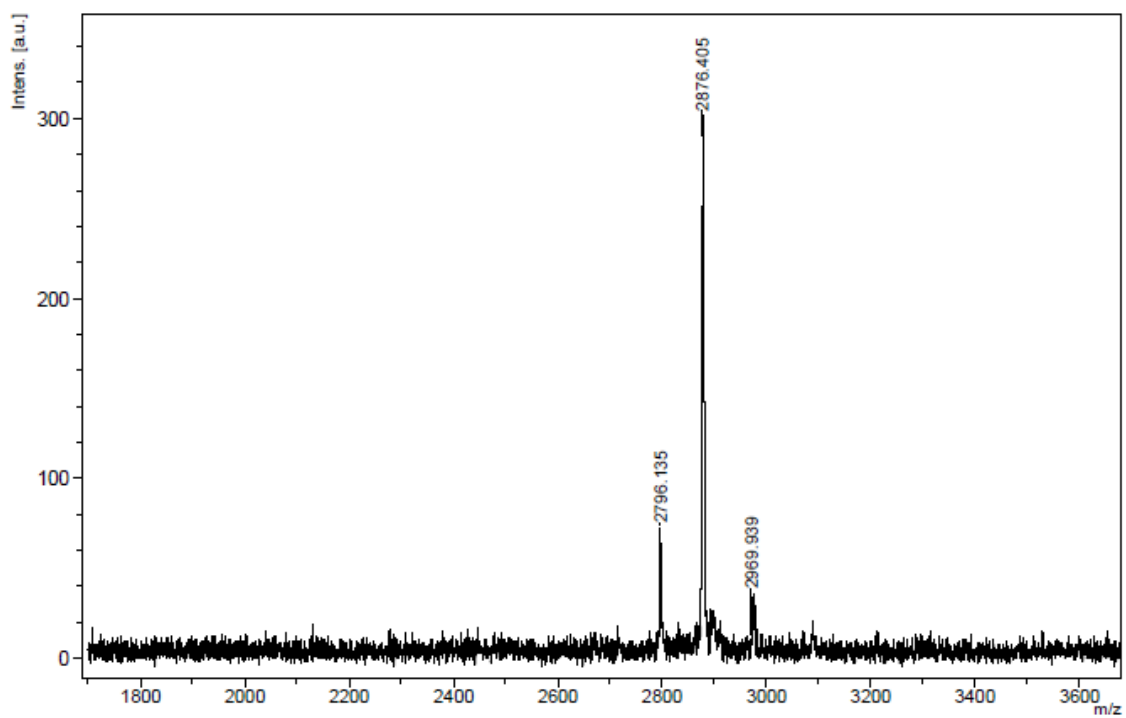

**Fig. S16.** MALDI-TOF spectrum of **Car-Pc2-1** (matrix:DHB)

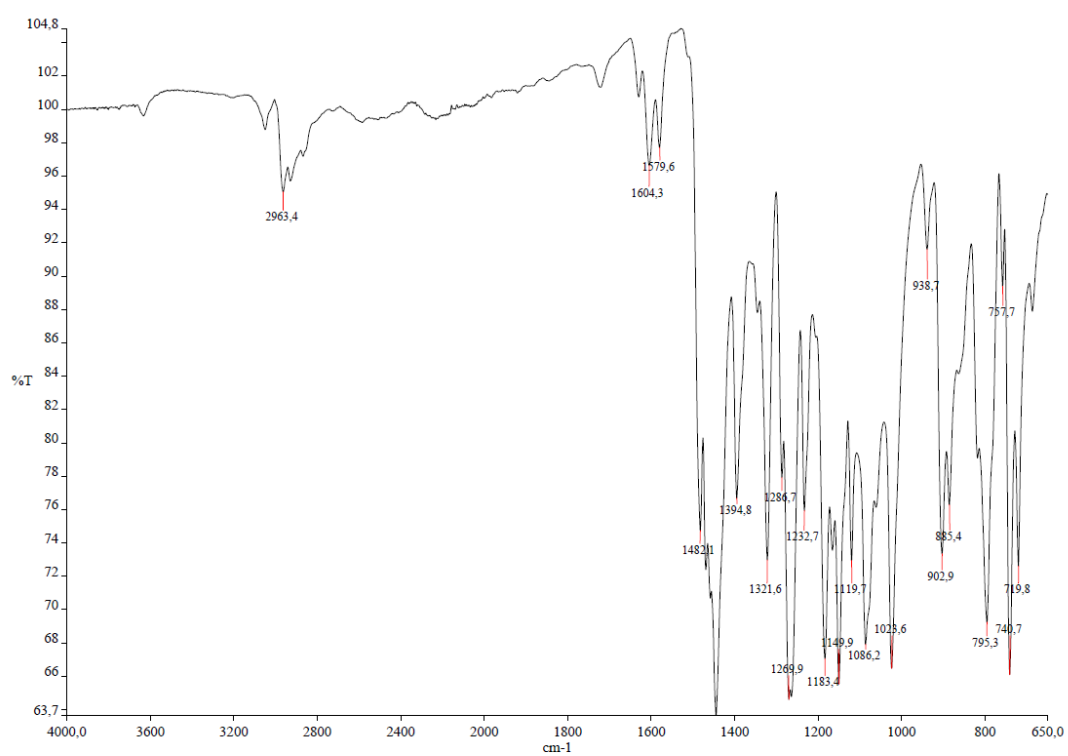

**Fig. S17.** FTIR spectrum of **Car-Pc2-2**

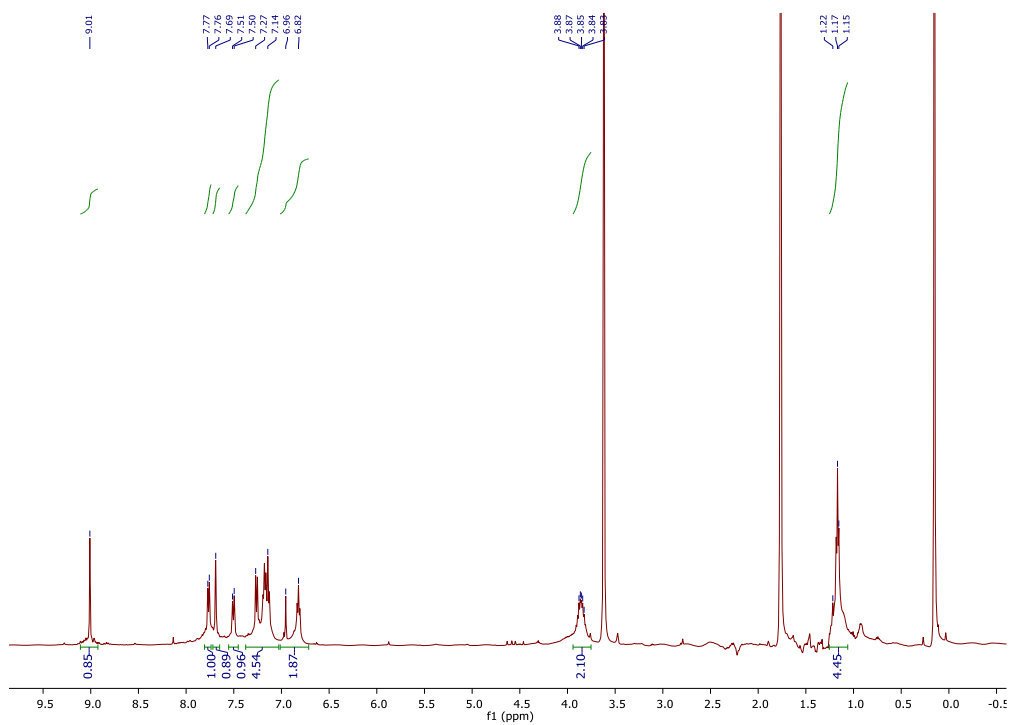

**Fig. S18.**  $^1\text{H}$ -NMR spectrum of reduced **Car-Pc<sub>2</sub>-2** in  $\text{THF-}d_8 + \text{NaBD}_4$

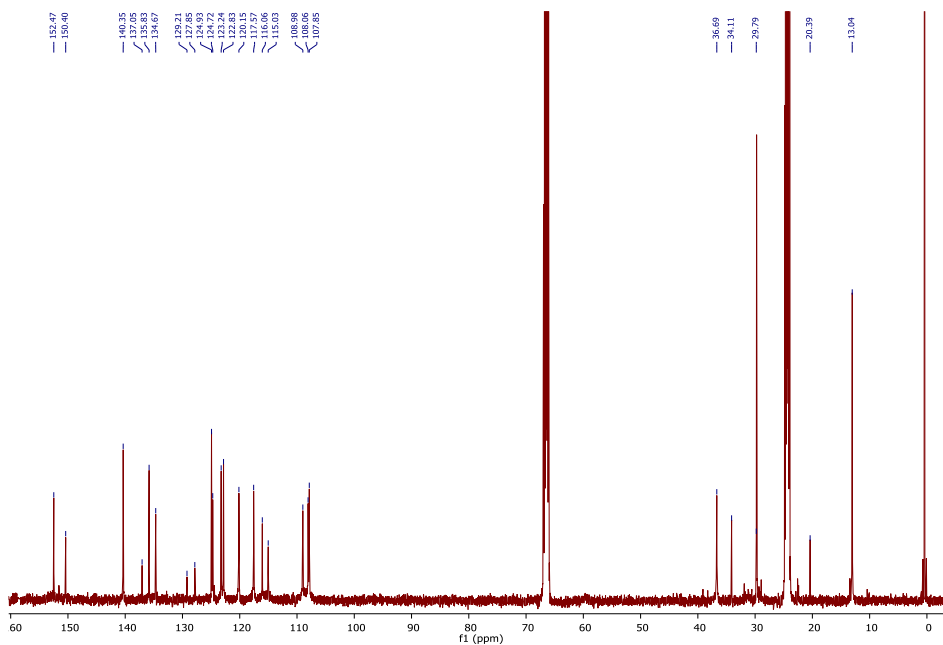

**Fig. S19.**  $^{13}\text{C}$  NMR spectrum of **Car-Pc<sub>2</sub>-2** in  $\text{THF-}d_8 + \text{NaBD}_4$

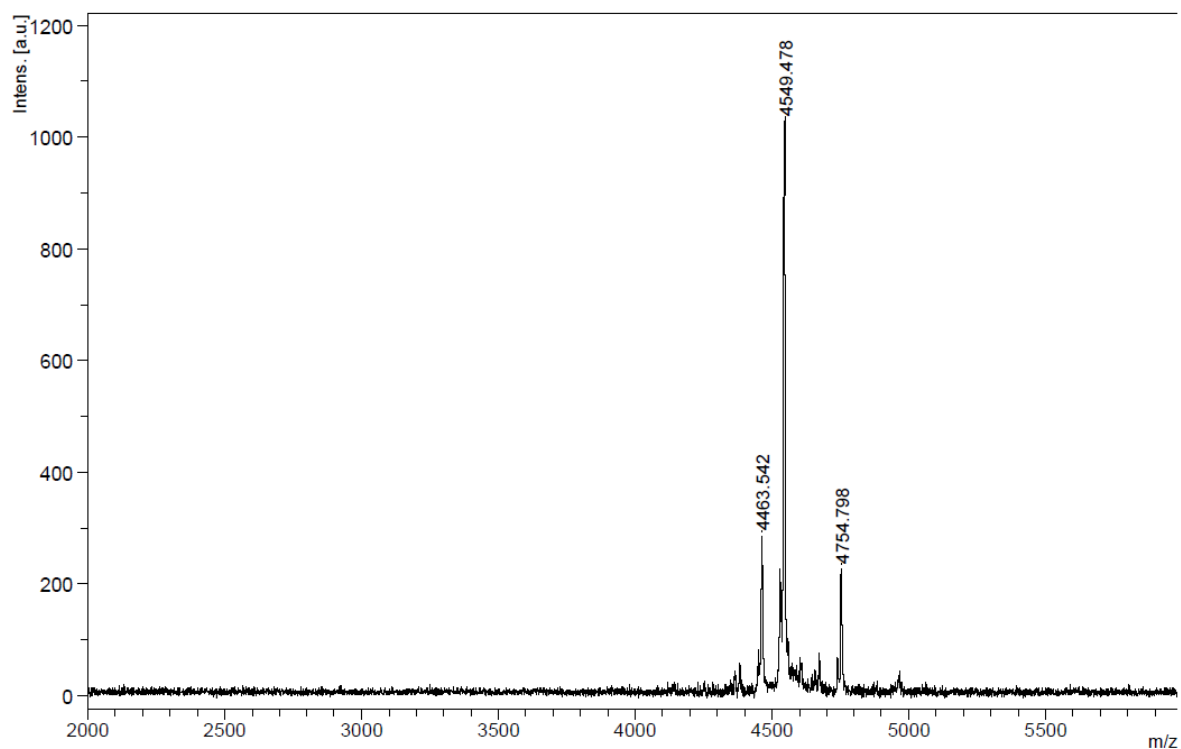

**Fig. S20.** MALDI-TOF spectrum of **Car-Pc<sub>2</sub>-2** (matrix:DHB)

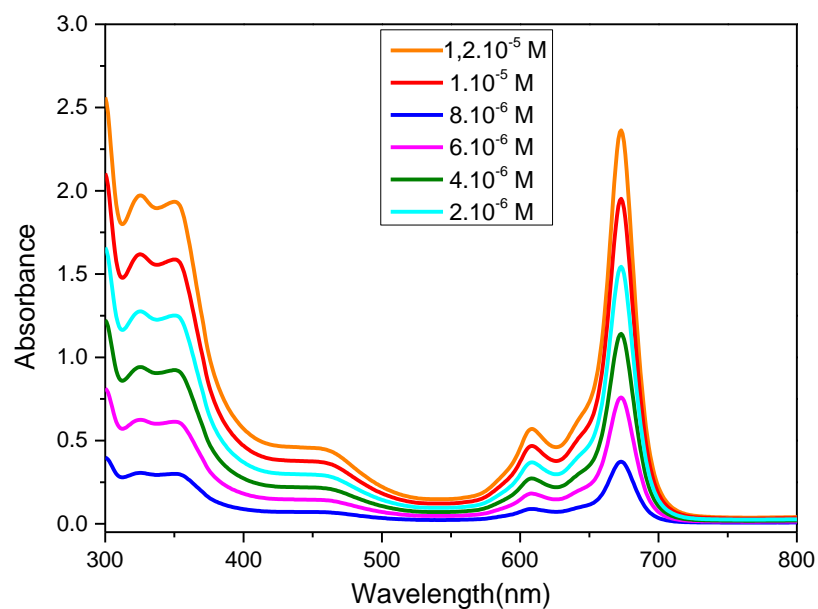

**Fig. S21.** Electronic absorption spectra of **Car-Pc<sub>2</sub>-1** in THF at six different concentration.

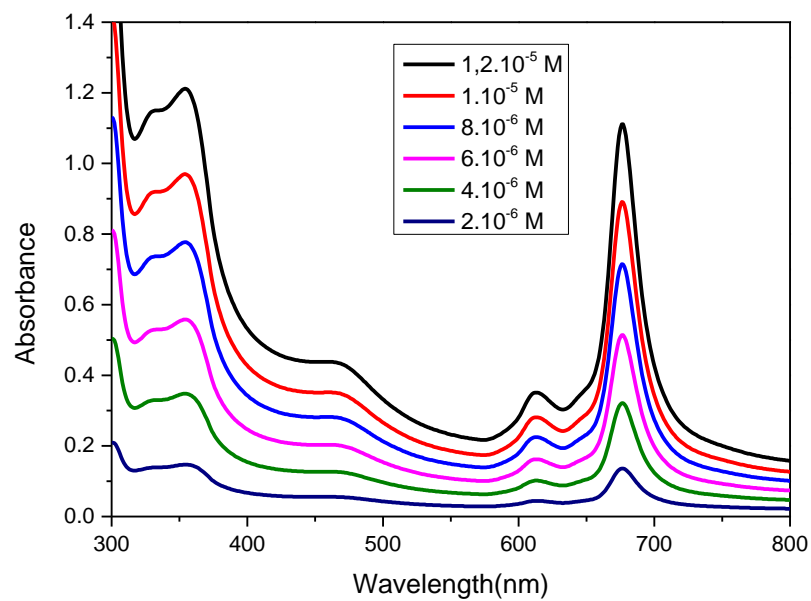

**Fig. S22.** Electronic absorption spectra of **Car-Pc<sub>2</sub>-2** in THF at six different concentration.

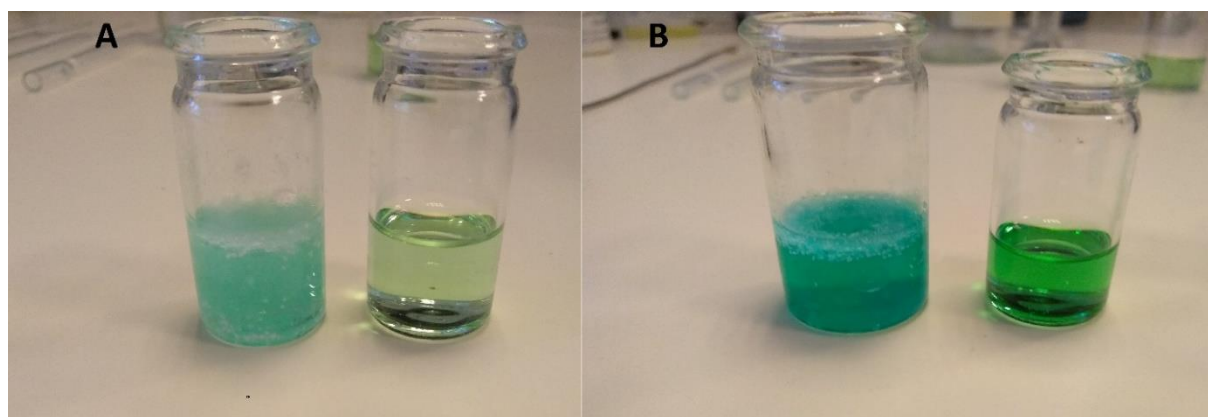

**Fig. S23.** Reduced (left) and neutral (right) forms of **Car-Pc<sub>2</sub>-1** (A) and **Car-Pc<sub>2</sub>-2** (B) bisphthalocyanine derivatives.

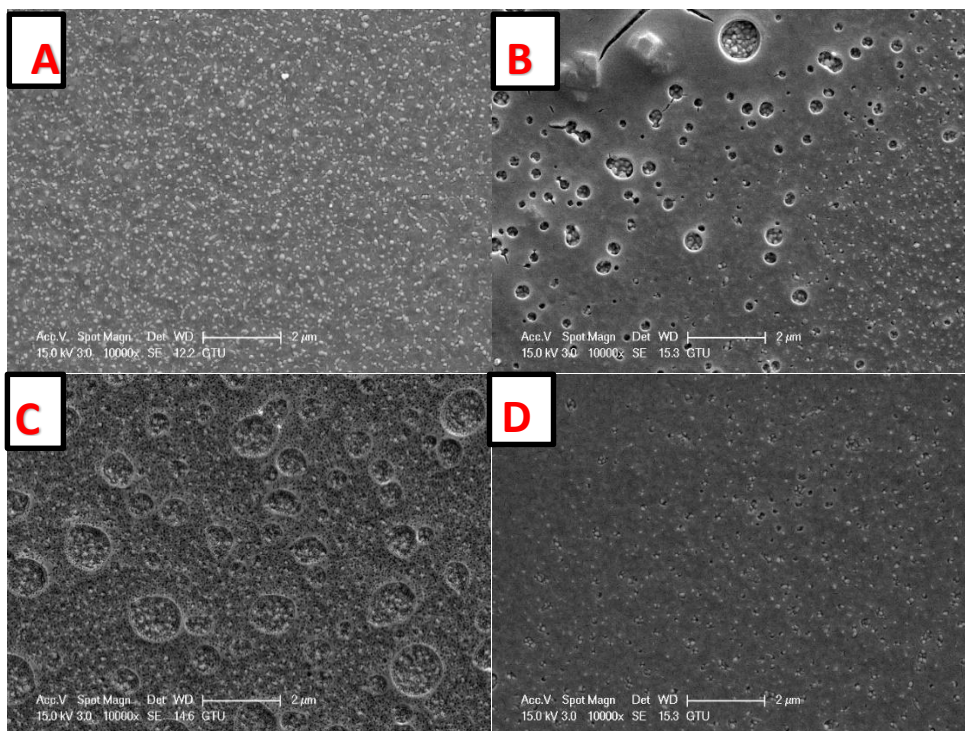

**Fig. S24.** SEM images of **Car-Pc<sub>2</sub>-2**(A), **Ply(Car-Pc<sub>2</sub>-2)** (B), **Grp/Ply(Car-Pc<sub>2</sub>-2)** (C) and **Grp/Car-Pc<sub>2</sub>-2**(D) films deposited on FTO electrode



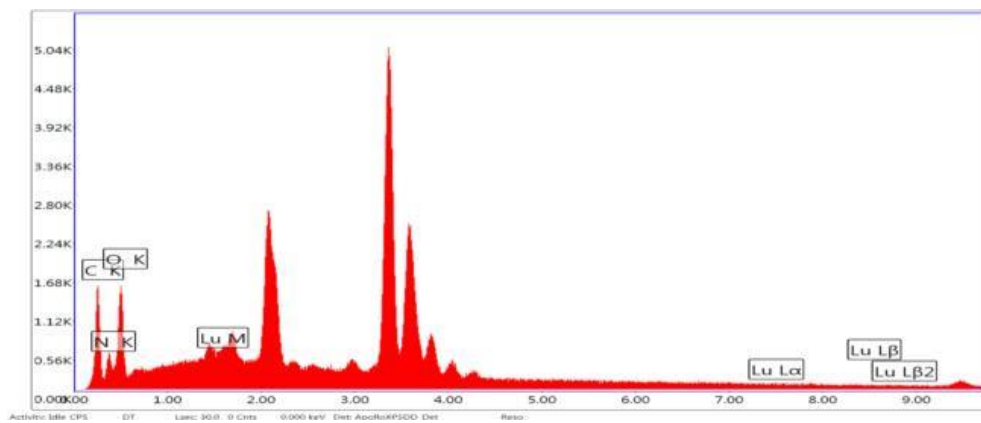

| Element | Weight % | Atomic % | Net int. | Net int.Error |
|---------|----------|----------|----------|---------------|
| C K     | 29.03    | 35.65    | 300.28   | 0.02          |
| N K     | 24.04    | 25.32    | 89.25    | 0.04          |
| O K     | 41.86    | 38.6     | 315.21   | 0.02          |
| LuL     | 5.07     | 0.43     | 8.59     | 0.53          |

**Fig. S25.** EDX image of Grp/Ply(Car-Pc-1)/GCE

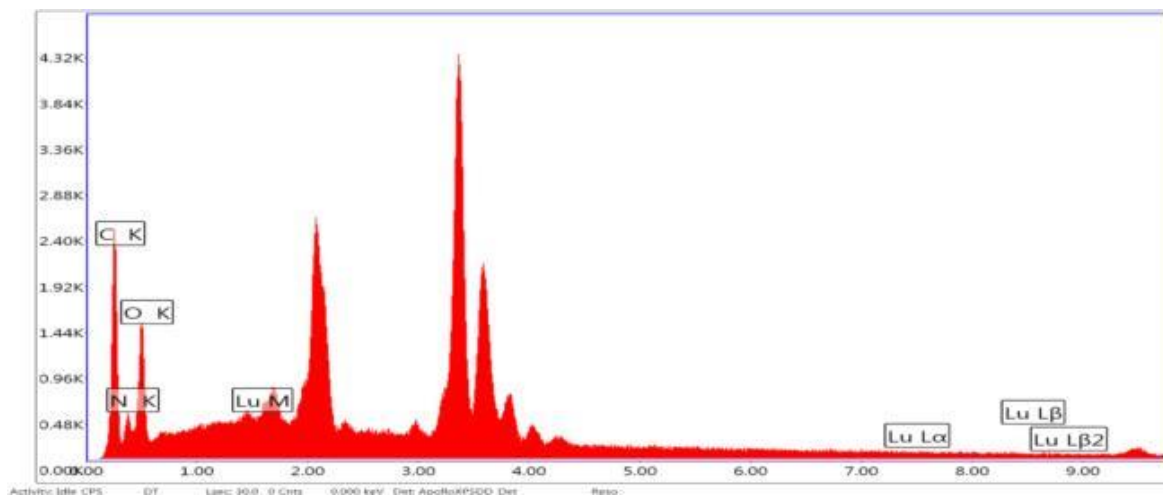

| Element | Weight % | Atomic % | Net int. | Net int.Error |
|---------|----------|----------|----------|---------------|
| C K     | 36.78    | 44.02    | 493.4    | 0.01          |
| N K     | 22.51    | 23.1     | 84.02    | 0.04          |
| O K     | 36.19    | 32.51    | 309.91   | 0.02          |
| LuL     | 4.53     | 0.37     | 9.44     | 0.53          |

**Fig. S26.** EDX image of Grp/Car-Pc-1/GCE

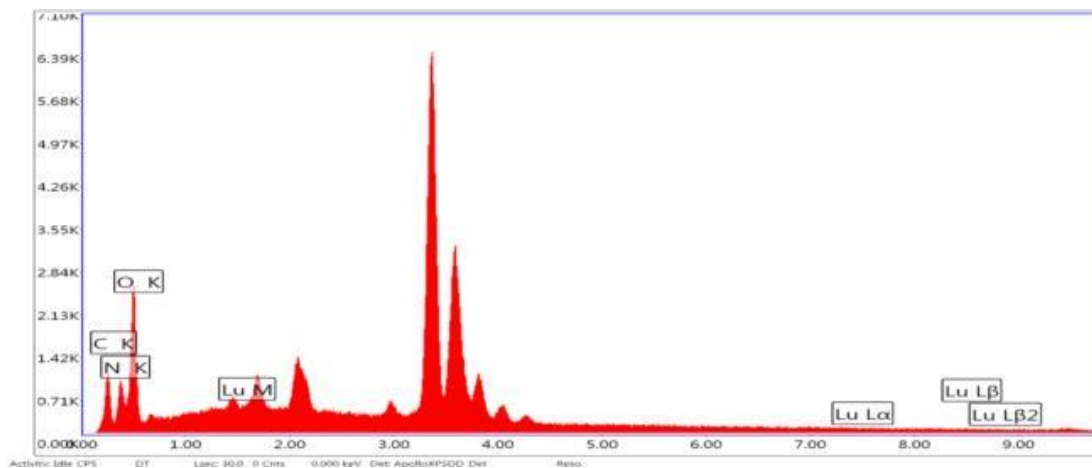

| Element | Weight % | Atomic % | Net int. | Net int.Error |
|---------|----------|----------|----------|---------------|
| C K     | 17.84    | 22.12    | 222.62   | 0.02          |
| N K     | 28.14    | 29.93    | 191.28   | 0.02          |
| O K     | 51.24    | 47.71    | 529.9    | 0.01          |
| LuL     | 2.78     | 0.24     | 5.85     | 0.54          |

**Fig. S27.** EDX image of Grp/Ply(Car-Pc-2)/GCE

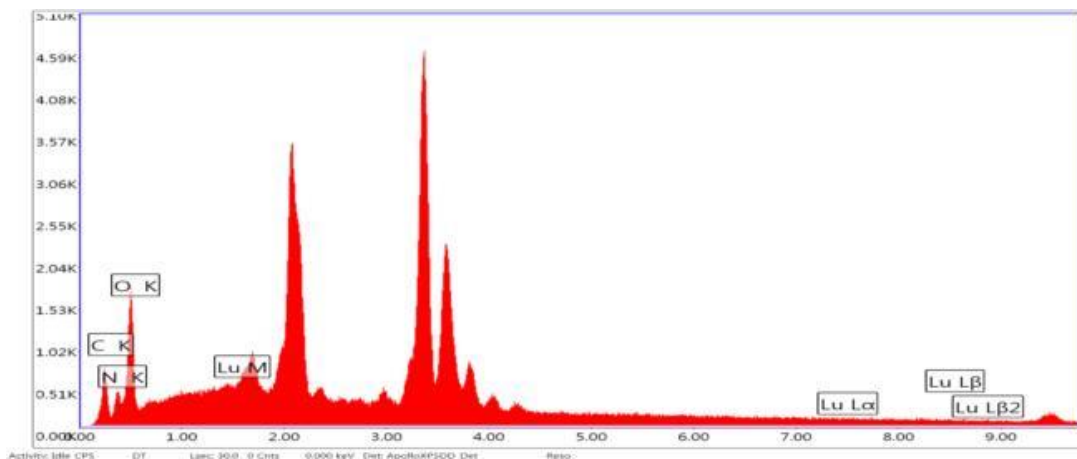

| Element | Weight % | Atomic % | Net int. | Net int.Error |
|---------|----------|----------|----------|---------------|
| C K     | 21.99    | 28.18    | 143.64   | 0.02          |
| N K     | 18.92    | 20.79    | 58.66    | 0.05          |
| O K     | 52.41    | 50.44    | 336.72   | 0.02          |
| LuL     | 6.69     | 0.59     | 7.79     | 0.53          |

**Fig. S28.** EDX image of Grp/Car-Pc-2/GCE

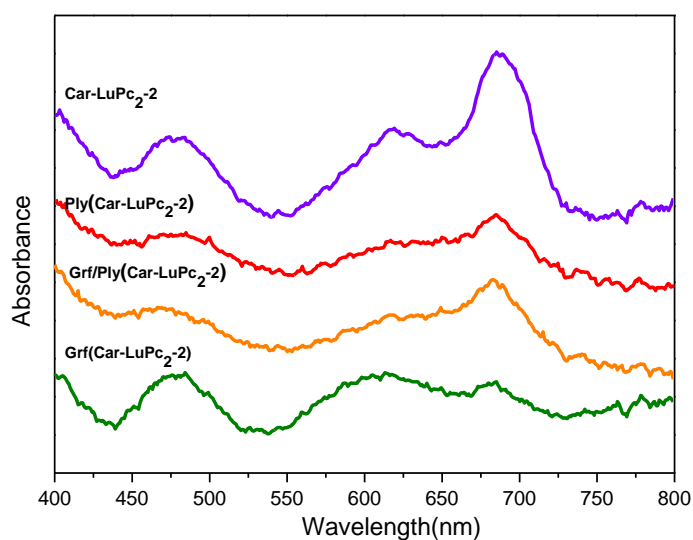

**Fig. S29.** UV-Vis spectra of Car-Pc<sub>2</sub>-2 based films on FTO

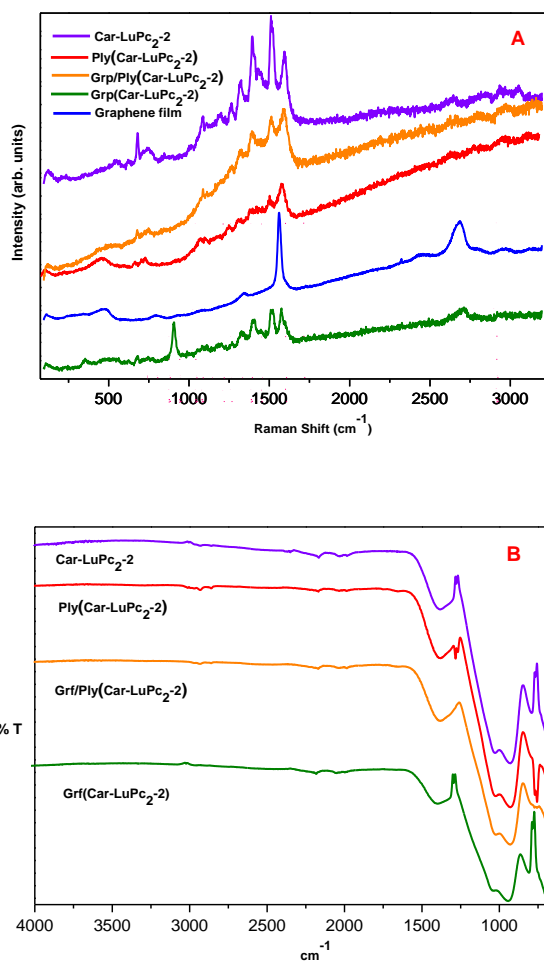

**Fig. S30.** Raman (A) and FT-IR (B) spectra of **Car-Pc<sub>2</sub>-2** based films on FTO

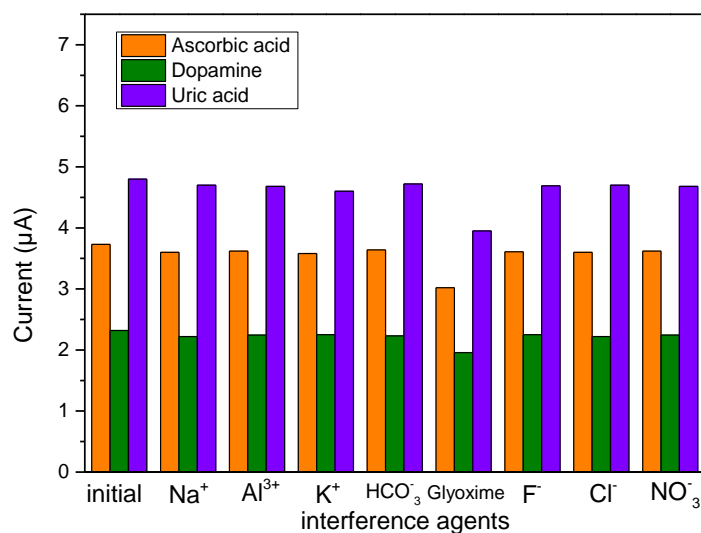

**Fig. S31.** Effect of the presence of interfering agents on the peak current AA, DA and UA for **Grp/Car-Pc<sub>2</sub>-2/GCE**

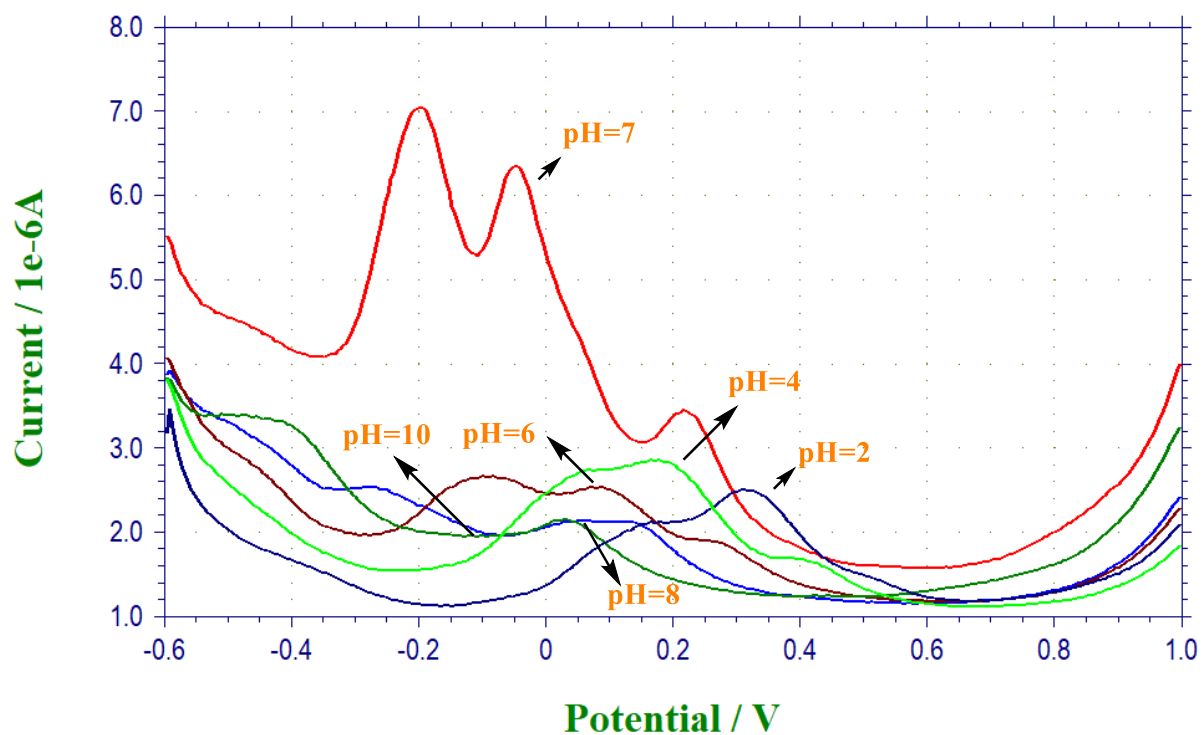

**Fig. S32.** Typical DPV of 160  $\mu\text{M}$  for AA on Grp/Car-Pc<sub>2</sub>-1/GCE under different pH values. ( Potential range: -0.6-1.0 V, pulse period (s): 0.2, quiet time(s): 2, pulse width: 0.05, incr (V): 0.004)
